# Supplementary material for: Predicted aquatic exposure effects from a national urban stormwater study
Source: Royal Society of Chemistry journal article supplement (doi:10.1039/d2ew00933a), 2023-01-01
Supplement: d2ew00933a1.xlsx [file d2ew00933a1.xlsx]

## Sheet: COVER PAGE
Predicted Aquatic Exposure Effects from a National Urban Stormwater Study
Paul M. Bradley,a Kristin M. Romanok,b Kelly L. Smalling,b Jason R. Masoner,c Dana W. Kolpind
aU.S. Geological Survey, Columbia, South Carolina, USA 29210; bU.S. Geological Survey, Lawrenceville, New Jersey, USA 08648; cU.S. Geological Survey, Oklahoma City, Oklahoma, USA 73116; dU.S. Geological Survey, Iowa City, Iowa, USA 52240
*Corresponding Author: pbradley@usgs.gov
Contents: Cover Page, 12 Tables
Acknowledgements: This research was conducted and funded by the USGS Ecosystems Mission Area, Environmental Health Programs. The Strong Heart Water Study team was supported by 1R01ES025135. Any use of trade, firm, or product names is for descriptive purposes only and does not imply endorsement by the U.S. Government. The findings and conclusions in this article do not necessarily represent the vi…

## Sheet: TABLE S1a. TOXEVAL EXCLUSIONS
CAS number	endPoint
111991-09-4	TOX21_AutoFluor_HEK293_Media_blue
115-86-6	NVS_NR_hPPARg
115−86−6	TOX21_p53_BLA_p3_ratio
115−96−8	TOX21_p53_BLA_p3_ratio
120068-37-3	NVS_NR_hCAR_Antagonist
122836-35-5	ATG_TA_CIS_dn
13194-48-4	NCCT_QuantiLum_inhib_dn
161050-58-4	ATG_Myb_CIS_up
173584-44-6	ATG_HSE_CIS_up
206−44−0	TOX21_p53_BLA_p3_ratio
30560-19-1	BSK_3C_SRB_up
30560-19-1	ATG_M_19_TRANS_dn
486-56-6	TOX21_p53_BLA_p3_viability
51218-45-2	TOX21_p53_BLA_p5_ratio
51218-45-2	TOX21_p53_BLA_p5_ch2
51235-04-2	TOX21_p53_BLA_p5_ratio
51235-04-2	TOX21_p53_BLA_p5_ch1
51235-04-2	TOX21_p53_BLA_p5_viability
60-51-5	NVS_NR_bER
61949-77-7	ATG_CMV_CIS_dn
759-94-4	ATG_Xbp1_CIS_dn
759-94-4	ATG_MRE_CIS_dn
759-94-4	ATG_HNF6_CIS_dn
759-94-4	ATG_GATA_CIS_dn
759-94-4	ATG_Myb_CIS_dn
759-94-4	ATG_PBREM_CIS_dn
759-94-4	TOX21_p53_BLA_p3_viability
80-05-7	CLD_CYP1A1_6hr
80-05-7	CLD_CYP1A2_6hr
82657-04-3	BSK_3C_Vis_down
82657-04-3	TOX21_NFkB_BLA_agonist_ch1
82657-04-3	NVS_NR_hPR
834-12-8	TOX21_p53_BLA_p4_ratio
84-66-2	NVS_ENZ_rMAOBP
84852-15-3	NVS_ENZ_hPTEN
86−74−8	TOX21_p53_BLA_p3_ratio
87674-68-8	TOX21_p53_BLA_p2_ch2
87674-68-8	TOX21_p53_BLA_p2_ratio
94-74-6	NVS_NR_hCAR_Antagonist
94-74-6	NVS_NR_hPPARg
#Table S1a. Compound:Endpoint combinations excluded from ToxCast evaluation due to unreliable concentration-response relationship and resulting lack of confidence in activity concentration at cutoff (ACC).
#[CAS number, Chemical Abstract Services Registry Number; endpoint, ToxCast assay endpoint name (https://www.epa.gov/chemical-research/toxicity-forecasting)]

## Sheet: TABLE S1b. EAR-CMPD NO ZF
Site	Nicotine	Benzylbutyl phthalate	Dimethyl phthalate	N-Nitrosodiphenylamine	Indeno[1,2,3-cd]pyrene	Ranitidine	4-Nitrophenol	Estrone	Phenanthrene	Estriol	Bisphenol A	Testosterone	Theophylline	Dibenzahanthracene	Fenhexamid	Bis(2-ethylhexyl) phthalate	Prometon	Benzokfluoranthene	4-tert-Octylphenol	Caffeine	Benzoapyrene	Trifloxystrobin	Pentachlorophenol	4-Androstene-3,17-dione	4-Cumylphenol	Benzobfluoranthene	Androsterone	Napropamide	Acetochlor	Phenol	Di-n-butyl phthalate	Fenbuconazole	Tebuconazole	Diethyl phthalate	Oryzalin	Cimetidine	Chlorothalonil	Propiconazole	Triclosan	2-Nitrophenol	Tetraconazole	Tris(2-butoxyethyl)phosphate	Penoxsulam	Bromacil	D-Limonene	4-Chloro-3-methylphenol	Carbaryl	Tris(dichloroisopropyl)phosphate	N-Nitrosodimethylamine
AL	-	68.5835	-	0.0324384	-	0.248791	0.492673	-	0.0104641	0.025904	-	-	-	0.00441231	0.00139006	0.00237024	-	0.192406	-	-	0.00146738	0.0370752	-	-	-	-	-	-	-	-	0.000194503	0.00029824	-	0.00181267	0.0177224	-	-	-	0.00706266	-	0.00145602	-	-	-	-	0.00152496	0.014143	8.45e-05	-
AZ1	1.48336	20.9447	0.406816	0.486576	8.7633	11.942	0.258653	4.57501	0.144753	5.63471	0.0851136	-	0.0140133	0.580901	0.0118155	0.308937	0.259736	0.139932	0.0414356	0.0107713	0.0155369	-	0.607059	0.469093	-	0.0482306	-	0.0509179	0.0784348	-	0.00265821	0.0022368	0.137667	-	-	0.0497449	0.0308431	0.0874702	0.0814284	-	-	0.0142803	-	0.0433801	-	0.018452	-	0.0450682	0.0210984
AZ2	0.511503	2.46408	-	-	1.50766	2.1396	0.178594	1.56913	0.0174401	0.182346	0.0250334	-	0.002234	0.126973	-	0.0654637	0.0296842	0.0849585	0.00820256	0.00116161	0.00189896	0.00450046	0.00205223	-	0.0292442	0.0122151	-	0.0119394	0.00479713	-	0.000324171	0.00119296	0.0129703	-	-	0.0285055	0.0133186	-	0.0112172	-	-	-	-	-	-	0.0166221	-	0.0250379	0.008545
CA1	1.12531	6.57087	0.526207	-	1.79035	2.41327	0.15396	3.90804	0.0784806	0.644862	0.0325434	-	0.00751437	0.0666608	0.0125106	0.0367629	0.0667894	0.134101	0.156441	0.00348484	0.00302107	0.0424329	-	-	0.0584884	0.0350081	0.498252	-	0.249311	-	0.00213953	0.00342976	0.0120032	0.032104	-	0.0318591	0.0182254	-	-	0.0293589	-	-	0.00111139	0.0323601	-	0.018757	-	-	0.00643205
CA2	0.102301	-	-	-	1.03652	0.883207	-	0.244172	-	0.120677	-	-	0.000406182	0.0311401	-	0.00744932	0.0296842	0.010828	0.0575025	0.000211203	0.0010358	0.0544341	0.0111371	-	0.0292442	0.014104	-	-	0.0047271	-	-	-	0.0158715	0.0297017	-	0.0201215	0.00420587	-	-	0.023274	-	-	-	-	-	0.0239724	-	0.000175265	0.00382195
CO	3.01787	-	0.822475	0.567672	-	1.20663	0.0708218	1.19387	0.149985	0.148616	0.122664	-	0.0239647	0.0422185	0.0243261	0.189619	0.0667894	0.0483098	0.378417	0.00897611	0.00258949	-	0.00170685	-	0.0584884	0.0191411	-	0.00737432	0.00227601	-	0.00298238	0.00417536	0.0182608	-	-	0.0139733	0.00771076	-	-	0.0430913	-	-	0.00266107	-	-	0.00155241	0.00284369	0.000397476	0.00425696
IN	147.313	43.9427	7.80467	12.5212	-	-	29.5604	0.167065	3.20898	0.0417908	3.37951	0.533932	0.745344	0.0147923	0.68391	0.0113513	-	-	0.00160669	0.3073	0.00198528	-	-	-	-	0.00591864	-	0.0463529	-	0.0920383	0.0784495	0.0490604	0.00182608	0.00578746	-	0.00279466	0.00280392	-	0.00789357	0.00428545	0.00139731	0.129144	0.0616743	-	0.0326466	-	0.00161936	-	0.00195758
KS	35.1914	3.69612	13.7742	9.18007	-	2.45059	0.0369505	0.83147	2.98226	1.50337	1.502	0.877908	0.326977	0.230138	0.343345	0.122865	0.0371052	0.0149927	0.00486234	0.12461	0.00189896	0.0965455	0.0169684	-	0.0292442	0.170003	-	0.013344	0.00357159	-	0.0953064	0.0741125	0.00405037	0.00550354	-	0.00558931	0.00911272	-	0.0174489	-	0.0642294	-	0.0250454	0.0222148	-	0.0130537	0.0603718	0.000306714	0.00730209
MI	4.55237	-	1.54767	0.956934	-	0.447823	-	0.282725	0.287762	0.190172	0.192757	0.0759827	0.0454924	0.0663434	0.0284963	0.013125	0.0148421	0.00832927	0.000528516	0.0163682	0.00207159	-	-	-	0.0292442	0.0170003	-	-	-	-	0.00797462	0.0102893	-	-	-	0.00447145	0.0126176	-	-	-	0.000763238	-	0.00453948	-	-	-	-	-	0.00459876
MN	0.767254	3.28544	-	0.340603	-	1.59226	0.0400297	0.231321	0.0872007	0.0949293	0.0525702	-	0.00771746	0.0390442	0.0139006	0.00419226	0.0445262	0.0324841	0.0224091	0.00316804	0.00120843	0.0188591	0.259782	-	0.0292442	0.00327414	-	0.0108859	0.00266118	-	0.00162086	0.00328064	-	-	-	0.00223572	0.00140196	-	-	-	0.00469685	-	-	-	-	-	0.00452336	-	0.00138584
NE	38.7719	11.9097	4.88621	3.6331	3.95762	0.858328	0.677426	0.870023	0.974903	0.318518	1.29673	0.325493	0.37978	0.24601	0.173063	0.227349	0.192947	0.187409	0.114371	0.186914	0.00595583	0.0117869	0.00340369	-	0.0877326	0.00591864	-	0.0765525	-	0.278569	0.0241184	0.0254995	0.00785043	0.0425869	0.230945	0.0134143	0.00841174	0.124664	0.0207725	0.0145137	0.0580061	0.0561279	0.0234801	0.0290367	0.0326466	0.0337016	0.0473144	0.0267905	0.0119941
NJ	7.05874	-	2.18663	1.84899	-	1.0076	0.0338713	0.480633	0.51274	0.482864	0.357978	-	0.0966714	0.137766	0.0521273	0.12867	0.0148421	0.0141598	0.00158555	0.0334756	0.0010358	0.00825084	-	-	0.0292442	0.015867	-	0.00632085	-	-	0.0141339	0.0131225	0.00343598	-	-	0.00558931	0.00350489	-	0.00498541	-	-	-	0.00990859	0.00997042	-	-	-	-	0.00621454
NY	4.65467	-	1.8174	0.729865	0.848061	-	-	3.77824	0.218002	0.3373	0.140187	-	0.0300575	0.176492	0.0278012	0.0492752	0.141	-	-	0.012461	0.00155369	0.30003	-	-	0.0584884	0.0170003	-	-	0.00756336	-	0.00648343	0.0104384	0.037318	0.00397478	-	0.00447145	-	-	-	-	-	-	0.00334982	-	-	-	-	0.00534246	0.00842071
OH	24.3475	-	9.48499	3.90883	18.2804	1.132	0.0615842	0.0899581	1.02897	0.0374865	0.986316	0.59554	0.185625	0.0166017	0.165417	0.0197036	-	-	0.00255801	0.0744489	0.000863163	0.0702928	-	-	-	0.00982242	-	0.145379	0.0152318	-	0.0284623	0.0545779	-	0.004761	-	-	-	-	0.00623176	-	0.0152648	-	0.0145107	-	-	0.000884477	0.0116703	0.00011893	0.000553094
OK1	10.9973	-	3.62597	2.59507	-	4.06773	-	1.05765	0.755158	1.27407	0.518192	0.227948	0.10581	0.253946	0.0834037	0.114803	0.0296842	0.0874573	0.0505261	0.0444582	0.00241686	-	0.00499542	0.297301	0.0292442	0.096713	-	-	0.00196087	-	0.0191261	0.0189382	0.00694024	0.00412766	-	0.0106197	0.00280392	-	-	-	0.0107675	-	0.00679356	0.0149731	0.106101	0.00817379	0.00812697	0.00574619	0.0100054
OK2	9.30935	2.87476	2.56471	1.57326	-	2.81134	0.646634	2.27851	0.490068	0.395213	0.350468	0.177635	0.058084	0.138083	0.0743683	0.0886824	0.0519473	0.0683	0.0117965	0.0234435	0.940848	0.1393	0.000420456	-	-	0.0104521	-	0.0140463	0.00234604	-	0.0103087	0.0120787	0.00482972	0.00102645	-	0.0111786	0.00350489	-	0.0191107	0.0108202	0.0203961	-	0.00505604	0.0114922	-	0.0153411	0.0053436	0.0158678	0.00229006
TX	1.07416	-	1.07452	0.778522	0.753832	1.40567	0.073901	0.354692	0.202306	0.102207	0.0625835	-	0.00934219	0.0172048	0.0403118	0.0166078	0.0371052	-	0.00118388	0.00369605	0.00595583	-	-	-	0.0292442	0.00982242	-	-	-	-	0.00492741	0.00626303	0.00417552	-	-	0.00391252	0.00140196	-	0.0120481	-	-	-	0.00109574	-	-	-	0.000248785	-	0.00522022
VA	1.22761	2.0534	0.581481	0.356823	-	0.995163	0.0585049	0.451076	0.109873	0.357648	0.0876169	-	0.0140133	0.0326955	0.00973043	0.147696	-	0.0216561	0.0765291	0.00538567	0.00198528	-	-	-	0.0584884	0.0178818	-	0.00737432	-	-	0.00213953	0.00342976	0.00560339	-	0.00378263	0.00670717	0.0126176	-	0.00913992	-	0.00194919	-	0.00178448	0.0106176	-	0.00651158	0.000283464	-	0.00814105
WA	1.63681	2.87476	0.592536	0.4217	0.94229	0.584658	0.178594	0.308428	0.106385	0.106199	0.0725969	-	0.0117793	0.00606296	0.023631	0.103517	0.0222631	0.00749634	0.110565	0.00601928	0.0010358	-	-	-	0.0584884	0.0216597	-	0.0210695	0.00507725	-	0.00272304	0.00387711	0.0114912	-	0.000575978	0.0139733	0.0105147	-	0.0108017	0.0184677	-	-	0.001174	-	-	-	-	-	0.00119009
WI1	52.1733	-	6.21278	4.10346	1.13075	1.132	-	0.970262	0.960951	0.159415	1.69226	0.370159	0.369626	0.0120307	0.186963	0.00156726	0.0371052	0.0191573	0.000887906	0.152066	0.0243412	0.0525053	-	-	0.0292442	0.01763	-	-	0.00339651	-	0.0312501	0.0393676	0.00104672	0.143267	-	0.0139733	0.0546763	-	-	0.0582443	0.00636423	-	0.030211	-	-	-	0.00103133	-	0.00163442
WI2	0.716104	-	-	-	-	1.24395	0.0492673	0.308428	0.0453443	0.11739	0.0250334	-	0.00487419	0.0148558	0.00556025	0.00973894	0.0890525	0.0133268	0.00224091	0.00211203	0.000863163	0.113583	-	-	-	0.014104	-	-	0.00231103	-	0.000648343	-	-	-	-	-	0.0406568	-	-	-	0.0152648	-	0.000594828	-	-	0.00822258	0.00335332	-	0.00535072
SEAR	346.032	169.2	57.9093	44.0352	39.0108	38.5626	32.5719	23.9507	12.372	12.2757	10.9822	3.1846	2.43933	2.25437	1.96207	1.66975	1.1651	1.0853	1.04365	1.02053	1.01957	0.949596	0.907525	0.766394	0.643373	0.561767	0.498252	0.411557	0.383665	0.370608	0.335971	0.335669	0.28534	0.274653	0.253026	0.243135	0.238333	0.212134	0.208141	0.202056	0.200555	0.199552	0.19299	0.174045	0.171394	0.16677	0.160873	0.124936	0.120413
Max EAR	147.313	68.5835	13.7742	12.5212	18.2804	11.942	29.5604	4.57501	3.20898	5.63471	3.37951	0.877908	0.745344	0.580901	0.68391	0.308937	0.259736	0.192406	0.378417	0.3073	0.940848	0.30003	0.607059	0.469093	0.0877326	0.170003	0.498252	0.145379	0.249311	0.278569	0.0953064	0.0741125	0.137667	0.143267	0.230945	0.0497449	0.0546763	0.124664	0.0814284	0.0582443	0.0642294	0.129144	0.0616743	0.0433801	0.106101	0.0337016	0.0603718	0.0450682	0.0210984
#Table S1b. Site-specific Exposure Activity Ratios (EAR) for the 142 detected compounds with exact Chemical Abstract Service (CAS) number matches and reliable concentration-response relationship and Activity Concentration at Cutoff (ACC) data in ToxCast EAR for the Environmental Health Program, National Stormwater Reconnaissance. Red shading indicates relative EAR across all samples.
#["-" indicates chemical not detected or EAR (or SEAR) < 0.00001]
[truncated: 94 more columns]

## Sheet: TABLE S1c. EAR-ENDPT NO ZF
Site	Nuclear Receptor	Cell Cycle	DNA Binding	Channel 2	CYP	Ion Channel	Protease	Transporter	Steroid Hormone	GPCR	Channel 1	Phosphatase	Oxidoreductase	Cell Morphology	Esterase	Hydrolase	Growth Factor Receptor	Apoptosis	Kinase	Growth Factor	Lyase	Misc Protein		SEAR
AL	0.914205	68.1737	0.0350677	0.0264494	0.183847	0.00472554	0.000142523	0.0134699	0.00355626	0.00111371	0.00220927	0.000179856	0.000917296	0.000442886	0.004699	0.000141971	0.000175706	6.43872e-05	0.000712781	-	5.73652e-06	7.20862e-06		69.3658
AZ1	5.08404	43.2437	4.59227	0.732906	0.181854	0.56874	0.00895927	0.0717065	0.0193046	0.196225	0.0332481	0.0630901	0.0164973	0.0225478	0.0176581	0.0194939	0.00034296	0.00575825	0.00606643	0.00185169	-	1.4872e-06		54.8863
AZ2	1.91598	4.03216	0.16746	0.129546	0.0704163	0.124808	0.00291552	0.0170363	0.00601136	0.029574	0.00343119	0.000213795	0.00191529	0.0053293	0.000617007	0.00175742	4.16674e-05	0.00127377	0.000757778	0.000211622	6.96341e-07	-		6.51146
CA1	3.97662	10.7587	0.668595	0.171594	0.183351	0.0674843	0.00769278	0.145588	0.0110883	0.083026	0.00727741	0.0030737	0.00262445	0.00904566	0.00199561	0.00193306	0.000689676	0.000782955	0.00192834	0.00047615	6.5655e-06	1.52892e-05		16.1036
CA2	0.337996	1.85807	0.148034	0.0546823	0.0532162	0.0309892	0.000806205	0.00777809	0.00581846	0.00822479	0.00437788	0.00322949	0.00122458	0.00229669	0.000757578	0.000488593	0.000279433	0.000139816	0.000225406	0.000211622	8.42241e-06	1.21204e-05		2.51886
CO	1.6058	4.40394	1.66941	0.324504	0.176804	0.0421825	0.0132272	0.0180091	0.0251575	0.0243597	0.0105059	0.00018126	0.00264719	0.0120974	0.00146967	0.00520083	0.000762083	0.00400716	0.000590754	0.00047615	-	2.24406e-05		8.34136
IN	29.9012	150.565	17.973	5.26291	1.08703	0.0174297	0.545553	0.52979	0.313013	0.00720247	0.120794	0.000553707	0.0433558	0.027328	0.000907749	0.0203931	0.00638122	0.0111211	8.76492e-05	-	-	1.56812e-05		206.433
KS	3.53649	37.1655	22.1668	3.42433	0.0501849	0.227972	0.446834	0.0403284	0.219699	0.0596672	0.0971117	0.00177586	0.0126684	0.0217379	0.0234446	0.018892	0.0112871	0.00827701	0.000453323	0.000264528	1.49382e-05	-		67.5338
MI	0.618624	5.19761	2.44006	0.402405	0.0114918	0.064968	0.0476082	0.00891961	0.0236217	0.0105649	0.0116026	1.31081e-07	0.00188432	0.00346775	0.00058851	0.00211134	0.00128884	0.000958761	0.000136537	0.000105811	-	-		8.84801
MN	0.459026	5.64605	0.577567	0.208082	0.0300513	0.0382365	0.00454545	0.0116248	0.00787524	0.00764566	0.00635099	0.0270006	0.00376851	0.00250634	0.001489	0.00507051	0.000107751	0.000258211	0.00212678	0.000317433	2.918e-06	-		7.03971
NE	2.64903	52.531	8.33703	2.00811	0.126174	0.241266	0.29873	0.0378848	0.127323	0.0268189	0.0526236	0.00443274	0.0130598	0.0252225	0.0157857	0.0117367	0.0040824	0.00813306	0.00237805	0.00137554	1.82375e-06	2.14447e-05		66.5222
NJ	1.06108	8.48623	3.95994	0.779971	0.0200545	0.134617	0.0491499	0.0132901	0.0439039	0.0215935	0.0209062	2.77041e-06	0.00324646	0.00866227	0.0015229	0.00586616	0.00184896	0.00373706	0.000240536	0.000105811	1.27663e-06	-		14.616
NY	4.04368	5.88045	2.67148	0.352683	0.143831	0.1734	0.0159585	0.0254491	0.0237161	0.0661204	0.0291427	0.000414409	0.00141758	0.0128322	0.00109078	0.00247123	0.00284468	0.00146584	0.00213573	0.00100521	4.64227e-05	-		13.4516
OH	1.40102	44.2707	12.6164	1.70592	0.0252976	0.0178259	0.284582	0.0174857	0.087407	0.00636679	0.0460257	0.000465476	0.00850526	0.00812779	0.00460197	0.00751942	0.00781072	0.00367582	0.000121521	-	1.08762e-05	-		60.5199
OK1	20175.4	13.4657	5.76591	1.10746	0.0549466	0.248596	0.121188	0.0202941	0.0615979	0.0512435	0.0289411	0.000914718	0.0058632	0.00986153	0.0062191	0.00616811	0.00299396	0.00399733	0.000538475	0.000211622	-	-		20196.4
OK2	4.19846	12.243	3.83565	0.699724	0.113707	0.137183	0.0815788	0.117031	0.0427844	0.0449363	0.0242253	0.000111054	0.00535142	0.0103398	0.00320266	0.00406742	0.00214703	0.00289285	0.00124815	0.000370339	2.15534e-05	5.63481e-06		21.5681
TX	0.641052	3.32153	1.73196	0.325013	0.0153403	0.0173713	0.00543091	0.00959853	0.0144967	0.00901006	0.00997681	3.93242e-08	0.00176529	0.00403658	0.000398343	0.00145893	0.000924361	0.000700561	0.000171291	0.000264528	-	-		6.1105
VA	0.747727	4.46134	1.18957	0.228831	0.0485584	0.0328044	0.00760362	0.00984006	0.0100114	0.0168484	0.00589967	1.37635e-07	0.00152199	0.00702045	0.00123207	0.00393061	0.000534276	0.00307571	0.000217838	-	-	-		6.77657
WA	0.713762	5.05204	1.08295	0.203013	0.0603704	0.00698758	0.0063464	0.0144694	0.0122066	0.00918008	0.00598702	3.34256e-07	0.00134024	0.00574649	0.000420039	0.00273062	0.000558876	0.00215898	0.000148949	0.000158717	-	9.6174e-06		7.18059
WI1	2.08682	53.4053	9.53207	1.76561	0.0779486	0.0135916	0.240591	0.030269	0.0968176	0.0218032	0.0471787	0.0137041	0.0165011	0.0122603	0.00102839	0.00688813	0.00540337	0.00435971	0.000641071	0.000264528	8.12398e-06	3.03318e-05		67.3791
WI2	0.52712	2.0083	0.15492	0.101206	0.0356445	0.0147641	0.00288954	0.0110273	0.00629846	0.009062	0.0105884	3.81929e-05	0.00135388	0.00581224	0.00148382	0.000720051	0.000539606	0.000277747	0.000264911	0.000634866	1.75743e-05	-		2.89297
SEAR	20241.8	536.17	101.316	20.0149	2.75012	2.22594	2.19233	1.17089	1.16171	0.710587	0.578404	0.119382	0.147429	0.216722	0.0906127	0.12904	0.0510446	0.0671161	0.0211923	0.00830617	0.000146928	0.000141256
Max EAR	20175.4	150.565	22.1668	5.26291	1.08703	0.56874	0.545553	0.52979	0.313013	0.196225	0.120794	0.0630901	0.0433558	0.027328	0.0234446	0.0203931	0.0112871	0.0111211	0.00606643	0.00185169	4.64227e-05	3.03318e-05
#Table S1c. Site-specific Exposure Activity Ratios (EAR) by ToxCast endpoint for those compounds with exact Chemical Abstract Service (CAS) number matches and reliable concentration-response relationship and Activity Concentration at Cutoff (ACC) data in ToxCast, for the Environmental Health Program, National Stormwater Reconnaissance. Red shading indicates relative EAR across all samples.
#["-" indicates chemical not detected or EAR (or SEAR) < 0.00001]

## Sheet: TABLE S1d. EAR-CMPD ZEBRAFISH
Site	Fipronil	Pentachlorophenol	BisphenolA	Azoxystrobin	Piperonyl butoxide	Tris(dichloroisopropyl)phosphate	Carbamazepine	Trifloxystrobin	Propiconazole	Tetraconazole	Triclosan	4-Androstene-3,17-dione		SEAR
AL	0.0357369	-	-	4.23e-05	3.77e-05	-	-	-	-	-	6.15e-06	-		0.035823
AZ1	-	0.0560725	0.00782133	-	0.000456721	0.000818636	0.000120013	-	-	-	-	-		0.0652892
AZ2	0.0133522	0.00640828	0.00268254	-	0.000411427	0.000469106	-	-	-	-	-	-		0.0233236
CA1	0.129399	0.0144186	0.00668108	0.00074835	0.00046427	0.000524295	-	-	0.000174638	-	2.61e-05	-		0.152436
CA2	0.126846	0.00640828	0.00041743	0.000692351	0.00059336	0.000331134	0.000395941	-	0.000138443	-	-	-		0.135823
CO	0.0104069	0.0144186	0.00204102	-	3.84e-05	0.000229954	-	-	0.000256323	-	-	-		0.0273912
IN	-	-	0.00028561	0.000134907	-	4.6e-05	-	-	2.55e-05	-	-	2.22e-05		0.000514217
KS	0.0787389	0.00801036	0.00142146	0.000128289	0.000323102	9.2e-05	-	-	-	-	-	-		0.0887141
MI	0.0149231	0.00320414	0.00048334	-	-	7.36e-05	-	-	-	-	-	-		0.0186842
MN	0.0290607	0.00961243	0.00039546	-	-	3.68e-05	-	-	-	-	-	-		0.0391054
NE	0.221883	0.0416538	0.00148737	0.00099271	0.000834177	0.000220756	-	-	8.63e-05	-	-	9.66e-06		0.267167
NJ	0.0190466	0.00320414	0.000821679	-	-	9.2e-05	-	-	-	-	-	-		0.0231644
NY	0.0113887	0.0304393	0.00645919	9.27e-05	-	7.36e-05	-	-	-	-	-	-		0.0484535
OH	0.0288644	-	0.00015379	0.00011098	2.19e-05	-	-	-	-	-	-	-		0.0291511
OK1	0.0182611	0.00640828	0.00180813	9.62e-05	0.000202316	0.000174765	-	-	-	-	7.69e-06	-		0.0269585
OK2	0.272935	0.0112145	0.00389528	2.39e-05	0.00037972	0.000183963	-	-	6.44e-05	-	-	-		0.288697
TX	0.0076579	0.00801036	0.000606372	-	-	6.44e-05	-	-	-	-	2.46e-05	-		0.0163636
VA	0.0522308	-	0.000771148	-	0.000161174	0.000110378	-	-	-	-	-	-		0.0532735
WA	0.0267045	0.00480621	0.00052728	-	-	0.000229954	5.74e-06	-	0.000109853	-	-	-		0.0323835
WI1	0.208923	0.00801036	0.00165874	0.00333958	-	0.000229954	-	0.000384473	0.000346459	0.000129769	-	-		0.223022
WI2	0.120563	0.0192249	0.00052728	-	0.000203524	-	-	-	-	-	-	-		0.140518
SEAR	1.42692	0.251525	0.0409455	0.00640226	0.00412779	0.0040013	0.000521694	0.000384473	0.00120192	0.000129769	6.454e-05	3.186e-05
Max EAR	0.272935	0.0560725	0.00782133	0.00333958	0.000834177	0.000818636	0.000395941	0.000384473	0.000346459	0.000129769	2.61e-05	2.22e-05
#Table S1d. Site-specific Exposure Activity Ratios (EAR) for the 12 detected compounds with EAR ≥0.00001 from among the 142 with exact Chemical Abstract Service (CAS) number matches and reliable concentration-response relationship and Activity Concentration at Cutoff (ACC) data for the Tanguay zebrafish endpoints in ToxCast, for the Environmental Health Program, National Stormwater Reconnaissance…
#["-" indicates chemical not detected or EAR (or SEAR) < 0.00001]

## Sheet: TABLE S2a. ACUTE FISH BENCHMK
CAS number	Chemical	Value
34256-82-1	Acetochlor	190
1912-24-9	Atrazine	2650
131860-33-8	Azoxystrobin	235
1861-40-1	Benfluralin	34.85
82657-04-3	Bifenthrin	0.075
188425-85-6	Boscalid	1350
314-40-9	Bromacil	18000
63-25-2	Carbaryl	110
500008-45-7	Chlorantraniliprole	6900
1897-45-6	Chlorothalonil	9
2921-88-2	Chlorpyrifos	0.9
210880-92-5	Clothianidin	50750
7440-50-8	Copper	15.7
736994-63-1	Cyantraniliprole	5000
68359-37-5	Cyfluthrin	0.034
1861-32-1	Dacthal (DCPA)	15000
134-62-3	N,N-diethyl-m-toluamide (DEET)	37500
165252-70-0	Dinotefuran	49550
97886-45-8	Dithiopyr	235
330-54-1	Diuron	660
5989-27-5	d-Limonene	40000
162650-77-3	Ethaboxam	1090
114369-43-6	Fenbuconazole	340
1031-07-8	Endosulfan sulfate	1.9
126833-17-8	Fenhexamid	670
120068-37-3	Fipronil	41.5
239110-15-7	Fluopicolide	174.5
59756-60-4	Fluridone	2550
239110-15-7	Fluopicolide	51000
51235-04-2	Hexazinone	137000
138261-41-3	Imidacloprid	114500
91465-08-6	Lambda-cyhalothrin	0.0145
161050-58-4	Methoxyfenozide	2100
51218-45-2	Metolachlor	1600
15299-99-7	Napropamide	6000
116714-46-6	Novaluron	480
19044-88-3	Oryzalin	1440
19666-30-9	Oxadiazon	600
42874-03-3	Oxyfluorfen	100
40487-42-1	Pendimethalin	69
219714-96-2	Penoxsulam	51000
82-68-8	Pentachloronitrobenzene (PCNB)	50
87-86-5	Pentachlorophenol (PCP)	47.5
52645-53-1	Permethrin	0.395
51-03-6	Piperonyl butoxide	1450
29091-21-2	Prodiamine	6.5
1610-18-0	Prometon	9800
60207-90-1	Propiconazole	425
53112-28-0	Pyrimethanil	5050
122-34-9	Simazine	3200
107534-96-3	Tebuconazole	1135
148-79-8	Thiabendazole	280
153719-23-4	Thiamethoxam	57000
10605-21-7	Carbendazim	3.7
141517-21-7	Trifloxystrobin	7.15
1582-09-8	Trifluralin	9.25
#Table S2a. U.S. Environmental Protection Agency (EPA) Office of Pesticide Programs (OPP) Acute Fish Aquatic Life Benchmarks in microgram/L (µg/L) used to calculate Toxicity Quotient results in Table S2b.

## Sheet: TABLE S2b. TQ ACUTE FISH
Site	Copper	Carbendazim	Lambda-cyhalothrin	Cyfluthrin	Bifenthrin	Pentachlorophenol (PCP)	Prodiamine	Permethrin	Chlorothalonil	Pendimethalin	Chlorpyrifos	Fipronil	Diuron	Trifloxystrobin	Thiabendazole	Trifluralin	Carbaryl	Azoxystrobin	N,N-diethyl-m-toluamide (DEET)	Acetochlor	Dithiopyr	Propiconazole	Atrazine	Oxyfluorfen	Metolachlor	Piperonyl butoxide	Fenhexamid	Simazine	Benfluralin	Fluopicolide	d-Limonene	Oxadiazon	Boscalid	Endosulfan sulfate	Bromacil	Oryzalin	Tebuconazole	Novaluron	Dinotefuran	Pyrimethanil	Prometon	Fenbuconazole	Pentachloronitrobenzene (PCNB)		STQ
AL	0.299679	0.0198649	0.110345	0.0558824	0.18	-	0.0196923	-	0.00384444	3.91304e-05	0.000344444	0.000438554	-	-	-	9.72973e-06	0.000299091	3.53191e-05	4.53333e-06	-	0.000147234	-	6.41509e-05	-	7.75e-06	6.89655e-06	-	0.000248125	2.5825e-06	-	-	1.76667e-05	-	-	-	-	-	-	-	-	-	-	-		0.690973
AZ1	4.34258	2.58919	1.09655	0.488235	-	0.0736842	-	-	-	0.0208696	0.00188889	-	0.00029697	-	0.00414286	8e-05	-	-	4.8e-05	-	8.04255e-05	-	-	-	-	8.34483e-05	-	-	1.40603e-05	-	-	-	-	-	-	-	-	-	-	-	-	-	-		8.61774
AZ2	0.515258	0.548649	0.565517	0.185294	-	0.00842105	0.00173846	-	0.000466667	0.00801449	0.0102222	0.000163855	5.87879e-05	-	1.46429e-05	0.000789189	-	-	5.86667e-06	-	8.08511e-05	-	-	2.1e-05	-	7.51724e-05	-	-	8.03443e-06	-	-	-	-	-	-	-	-	-	-	-	-	1.97059e-05	-		1.84482
CA1	0.989783	0.308108	1.06207	0.388235	0.244	0.0189474	-	-	0.0044	-	-	0.00158795	0.00112121	-	-	1.18919e-05	0.000641818	0.000625532	9.33333e-06	-	0.000376596	0.000291765	-	-	-	7.51724e-05	-	-	-	0.000204011	5.25e-06	2.7e-05	3.93333e-05	-	-	-	-	-	-	-	-	-	-		3.02056
CA2	0.260947	0.0624324	0.042069	0.1	0.0466667	0.00842105	-	-	0.00564444	8.11594e-05	0.00133333	0.00155663	0.000412121	-	4.67857e-05	7.56757e-06	0.000981818	0.000578723	3.2e-06	-	0.000485106	0.000231294	-	1.3e-05	-	7.65517e-05	-	1.20625e-05	-	2.52149e-05	-	3.71667e-05	9.62963e-05	-	-	3.95833e-05	-	4.14583e-05	-	-	-	-	-		0.53224
CO	0.307852	1.58919	0.117241	-	-	0.0189474	0.00609231	-	-	0.000184058	0.0108889	0.000127711	0.00271212	-	1.21786e-05	0.000324324	-	-	8e-06	-	6.25532e-05	0.000428235	2.26792e-05	2.2e-05	-	5.24138e-06	-	-	2.86944e-06	-	1.3e-05	-	-	-	1.11111e-05	2.61111e-05	7.19824e-05	-	-	-	-	-	-		2.05425
IN	0.610539	0.0951351	-	0.276471	-	-	-	-	-	-	0.000977778	-	1.15152e-05	-	-	0.000108108	-	0.000112766	6.13333e-06	-	3.31915e-05	4.25882e-05	1.09434e-05	1.4e-05	7.4375e-06	-	-	1.97812e-05	-	-	7.375e-05	-	-	-	-	-	-	-	-	-	-	-	-		0.983563
KS	0.846756	1.02973	0.482759	0.0617647	-	0.0105263	0.0504615	-	0.0100111	0.000142029	0.000866667	0.000966265	3.48485e-05	-	0.000121071	0.000259459	-	0.000107234	5.86667e-06	0.0018	0.000506383	-	0.000479245	-	0.00026875	4.2e-05	-	-	4.87805e-06	-	-	-	-	-	2.77778e-05	-	-	-	-	-	-	-	-		2.49764
MI	0.342545	0.11	-	0.0411765	-	0.00421053	-	-	-	-	-	0.000183133	3.78788e-06	-	-	-	-	-	6.4e-06	-	2.17021e-05	-	-	-	4.0625e-06	-	-	-	-	-	-	-	2.3037e-05	-	-	-	-	-	-	-	-	-	-		0.498174
MN	0.273419	0.0175676	-	-	-	0.0126316	-	-	0.000977778	-	-	0.000178313	8.0303e-05	-	0.000732143	3.13514e-05	-	-	3.73333e-06	-	3.82979e-05	-	2.83019e-05	-	1.25e-05	-	0.000523881	-	-	-	-	-	-	-	-	-	-	-	-	-	-	-	-		0.306225
NE	1.12349	1.90541	5.38621	0.511765	1.02933	0.0547368	0.00752308	-	0.00122222	0.00715942	0.002	0.00272289	0.000819697	-	2.42857e-05	0.00218378	0.00103636	0.000829787	1.84e-05	0.000626316	9.87234e-05	0.000144235	0.000218868	0.000821	0.0001625	8.2069e-05	-	-	0.000286944	-	3.15e-05	0.000100167	-	-	-	-	-	-	2.80525e-05	3.14851e-05	-	-	-		10.0391
NJ	1.44883	1.07838	-	-	-	0.00421053	0.00293846	-	0.000855556	-	-	0.000233735	1.13636e-05	-	-	-	-	-	3.2e-06	-	3.70213e-05	-	-	-	-	-	-	-	-	-	-	-	-	-	-	-	-	-	-	-	-	-	-		2.5355
NY	0.542299	0.206486	-	-	-	0.04	-	-	0.0155556	0.00101014	0.000222222	6.98795e-05	-	-	-	3.56757e-05	-	3.87234e-05	4.8e-06	-	2.55319e-05	-	-	-	-	-	-	-	8.60832e-07	-	-	-	-	4.73684e-05	-	-	-	-	-	-	-	-	-		0.805797
OH	0.436954	0.165135	-	0.0764706	-	-	0.0223077	-	0.00728889	5.50725e-05	0.000188889	0.000354217	1.83333e-05	-	-	0.000151351	-	9.2766e-05	2.66667e-06	0.000242632	0.000381702	-	5.66038e-05	1.3e-05	4.375e-05	4e-06	-	-	-	-	-	-	-	-	-	-	-	-	-	-	-	-	-		0.709761
OK1	0.241779	0.962162	0.344828	0.25	0.0533333	0.00842105	0.0269231	-	-	0.00181159	0.00244444	0.000224096	0.000362121	-	2.60714e-05	-	0.000727273	8.04255e-05	7.46667e-06	-	2.76596e-05	-	4.15094e-05	-	3.125e-05	2.95172e-05	-	2.06875e-05	-	-	-	-	3.40741e-06	4.21053e-05	7.83333e-05	-	-	-	-	-	1.32653e-05	-	-		1.89342
OK2	0.446941	0.743243	1.46897	0.752941	0.110667	0.0147368	0.0213846	0.0774684	0.0144444	0.00518841	0.00466667	0.0033494	8.45455e-05	-	3e-06	0.000151351	-	2e-05	0.00290667	-	0.000121277	0.000107529	2.64151e-05	7.8e-06	5.625e-05	4.84828e-05	-	0.000179687	-	-	5.75e-06	-	-	-	9.44444e-06	3.26389e-05	-	-	-	-	-	-	-		3.66776
TX	0.278061	0.139189	0.0503448	0.0323529	-	0.0105263	-	-	-	-	0.00166667	9.39759e-05	8.48485e-06	-	-	8.64865e-06	-	-	1.84e-05	-	-	-	3.11321e-06	-	-	-	-	-	-	-	-	-	-	-	-	-	-	-	-	-	-	-	-		0.512273
VA	0.678129	1.23784	0.0337931	0.0529412	-	-	-	-	-	-	-	0.000640964	0.000548485	-	-	-	-	-	6.13333e-06	-	1.06383e-05	-	3.54717e-06	1.2e-05	1.0375e-05	2.94483e-05	-	-	-	-	-	-	-	-	-	-	-	-	-	-	-	-	-		2.00396
WA	0.680576	0.867568	-	0.117647	-	0.00631579	-	-	-	-	0.0004	0.000327711	0.000792424	-	-	1.40541e-05	-	-	3.2e-06	-	-	0.000183529	-	1.2e-05	-	-	-	-	-	-	4.8e-05	-	-	4.73684e-05	-	-	-	-	-	-	-	-	1.76e-05		1.67395
WI1	0.443581	0.00656757	0.655172	-	-	0.0105263	-	-	0.00272222	-	0.00144444	0.00128193	3.18182e-06	0.00640559	-	2.59459e-05	0.000342727	0.00139574	3.84e-05	-	0.000146383	0.000289412	6.45283e-06	-	1.53125e-05	-	-	-	4.5911e-06	-	1.5e-05	-	-	-	-	-	-	-	-	-	-	-	-		1.12998
WI2	0.11993	0.0408108	0.241379	0.0705882	-	0.0126316	0.0207692	-	0.00588889	-	0.0005	0.000739759	8.0303e-06	-	-	1.72973e-05	-	-	1.33333e-06	0.000127368	0.000108936	-	1.13208e-05	-	2.1875e-05	1.37931e-05	-	-	-	-	-	-	-	-	-	-	-	-	-	-	-	-	-		0.513547
STQ	15.2299	13.7226	11.6572	3.46176	1.664	0.317895	0.179831	0.0774684	0.0733222	0.0445551	0.0400556	0.015241	0.00738833	0.00640559	0.00512304	0.00420973	0.00402909	0.00391702	0.00311173	0.00279632	0.00279021	0.00171859	0.000973151	0.0009358	0.000641812	0.000571793	0.000523881	0.000480344	0.000324821	0.000229226	0.00019225	0.000182	0.000162074	0.000136842	0.000126667	9.83333e-05	7.19824e-05	4.14583e-05	2.80525e-05	3.14851e-05	1.32653e-05	1.97059e-05	1.76e-05
Max TQ	4.34258	2.58919	5.38621	0.752941	1.02933	0.0736842	0.0504615	0.0774684	0.0155556	0.0208696	0.0108889	0.0033494	0.00271212	0.00640559	0.00414286	0.00218378	0.00103636	0.00139574	0.00290667	0.0018	0.000506383	0.000428235	0.000479245	0.000821	0.00026875	8.34483e-05	0.000523881	0.000248125	0.000286944	0.000204011	7.375e-05	0.000100167	9.62963e-05	4.73684e-05	7.83333e-05	3.95833e-05	7.19824e-05	4.14583e-05	2.80525e-05	3.14851e-05	1.32653e-05	1.97059e-05	1.76e-05
#Table S2b. Site-specific Toxicity Quotients (TQ), based on U.S. Environmental Protection Agency (EPA) Office of Pesticide Programs (OPP) Acute Fish Aquatic Life Benchmarks in Table S2a, for the Environmental Health Program, National Stormwater Reconnaissance. Red shading indicates relative TQ across all samples.
#["-" indicates chemical not detected or TQ (or STQ) < 0.00001]

## Sheet: TABLE S2c. ACUTE INVERT BENCHMK
CAS number	Chemical	Value
95-76-1	3,4-Dichloroaniline (DCA)	19.5
103-90-2	Acetaminophen	14750
82657-04-3	Bifenthrin	0.0002465
63-25-2	Carbaryl	0.85
500008-45-7	Chlorantraniliprole	8.3
1897-45-6	Chlorothalonil	27
2921-88-2	Chlorpyrifos	0.0069
210880-92-5	Clothianidin	11
736994-63-1	Cyantraniliprole	10.2
68359-37-5	Cyfluthrin	0.0125
1861-32-1	Dacthal (DCPA)	13500
134-62-3	N,N-diethyl-m-toluamide (DEET)	37500
165252-70-0	Dinotefuran	484150
97886-45-8	Dithiopyr	2600
330-54-1	Diuron	87.5
5989-27-5	d-Limonene	19500
1031-07-8	Endosulfan sulfate	150
162650-77-3	Ethaboxam	185
114369-43-6	Fenbuconazole	1150
126833-17-8	Fenhexamid	9400
120068-37-3	Fipronil	0.11
239110-15-7	Fluopicolide	850
59756-60-4	Fluridone	2600
51235-04-2	Hexazinone	75800
138261-41-3	Imidacloprid	0.385
91465-08-6	Lambda-cyhalothrin	4e-05
161050-58-4	Methoxyfenoxide	28.5
51218-45-2	Metolachlor	11750
15299-99-7	Napropamide	12350
116714-46-6	Novaluron	0.075
19044-88-3	Oryzalin	750
19666-30-9	Oxadiazon	1200
42874-03-3	Oxyfluorfen	750
40487-42-1	Pendimethalin	140
219714-96-2	Penoxsulam	49150
82-68-8	Pentachloronitrobenzene (PCNB)	385
87-86-5	Pentachlorophenol (PCP)	25
52645-53-1	Permethrin	0.0033
51-03-6	Piperonyl butoxide	21.1
29091-21-2	Prodiamine	6.5
1610-18-0	Prometon	12850
60207-90-1	Propiconazole	2400
53112-28-0	Pyrimethanil	1500
122-34-9	Simazine	500
107534-96-3	Tebuconazole	1440
112281-77-3	Tetraconazole	1315
148-79-8	Thiabendazole	155
153719-23-4	Thiamethoxam	17.5
10605-21-7	Carbendazim	55
141517-21-7	Trifloxystrobin	12.65
1582-09-8	Trifluralin	125.5
34256-82-1	Acetochlor	4100
1912-24-9	Atrazine	360
131860-33-8	Azoxystrobin	130
1861-40-1	Benfluralin	1090
188425-85-6	Boscalid	2665
314-40-9	Bromacil	60500
7440-50-8	Copper	2.05
#Table S2c. U.S. Environmental Protection Agency (EPA) Office of Pesticide Programs (OPP) Acute Invertebrate Aquatic Life Benchmarks in microgram/L (µg/L) used to calculate Toxicity Quotient results in Table S2d.

## Sheet: TABLE S2d. TQ ACUTE INVERT
Site	Copper	Lambda-cyhalothrin	Bifenthrin	Permethrin	Cyfluthrin	Chlorpyrifos	Fipronil	Imidacloprid	Novaluron	Carbendazim	Pentachlorophenol (PCP)	Carbaryl	Prodiamine	Thiamethoxam	Diuron	Pendimethalin	Thiabendazole	Piperonyl butoxide	Chlorothalonil	Trifloxystrobin	Atrazine	Clothianidin	N,N-diethyl-m-toluamide (DEET)	Azoxystrobin	Simazine	3,4-Dichloroaniline (DCA)	Chlorantraniliprole	Cyantraniliprole	Trifluralin	d-Limonene	Acetaminophen	Oxyfluorfen	Methoxyfenoxide	Pyrimethanil	Acetochlor	Oryzalin	Propiconazole	Tebuconazole	Oxadiazon	Boscalid	Ethaboxam	Dithiopyr	Fluopicolide	Fenhexamid	Metolachlor	Bromacil	Imidacloprid	Prometon
AL	2.2951	40	54.7667	-	0.152	0.0449275	0.165455	0.353247	-	0.00133636	-	0.0387059	0.0196923	-	-	1.92857e-05	-	0.000473934	0.00128148	-	0.000472222	0.00209091	-	6.38462e-05	0.001588	0.000307692	-	-	-	-	-	-	-	-	-	-	-	-	8.83333e-06	-	-	1.33077e-05	-	-	-	-	-	-
AZ1	33.2578	397.5	-	-	1.328	0.246377	-	0.532468	-	0.174182	0.14	-	-	-	0.00224	0.0102857	0.00748387	0.0057346	-	-	-	-	4.8e-05	-	-	-	-	-	5.89641e-06	-	0.000115254	-	-	-	-	-	-	-	-	-	-	7.26923e-06	-	-	-	-	7.32143e-06	-
AZ2	3.94612	205	-	-	0.504	1.33333	0.0618182	0.0812987	-	0.0369091	0.016	-	0.00173846	-	0.000443429	0.00395	2.64516e-05	0.00516588	0.000155556	-	-	-	5.86667e-06	-	-	-	-	-	5.81673e-05	-	2.34576e-05	-	0.000108772	-	-	-	-	-	-	-	-	7.30769e-06	-	-	-	-	-	-
CA1	7.58029	385	74.2394	-	1.056	-	0.599091	0.144416	-	0.0207273	0.036	0.0830588	-	-	0.00845714	-	-	0.00516588	0.00146667	-	-	-	9.33333e-06	0.00113077	-	0.000348718	-	-	-	1.07692e-05	5.2678e-05	-	-	-	-	-	5.16667e-05	-	1.35e-05	1.9925e-05	-	3.40385e-05	4.18824e-05	-	-	-	-	-
CA2	1.99847	15.25	14.1988	-	0.272	0.173913	0.587273	0.0942857	0.265333	0.0042	0.016	0.127059	-	-	0.00310857	4e-05	8.45161e-05	0.00526066	0.00188148	-	-	-	-	0.00104615	7.72e-05	0.000415385	-	-	-	-	9.22034e-06	-	-	-	-	7.6e-05	4.09583e-05	-	1.85833e-05	4.87805e-05	-	4.38462e-05	5.17647e-06	-	-	-	-	-
CO	2.35769	42.5	-	-	-	1.42029	0.0481818	0.0423377	-	0.106909	0.036	-	0.00609231	-	0.0204571	9.07143e-05	2.2e-05	0.00036019	-	-	0.000166944	0.000527273	8e-06	-	-	0.00134359	-	-	2.39044e-05	2.66667e-05	5.91186e-06	-	-	-	-	5.01333e-05	7.58333e-05	5.67361e-05	-	-	-	5.65385e-06	-	-	-	-	-	-
IN	4.67584	-	-	-	0.752	0.127536	-	0.0981818	-	0.0064	-	-	-	-	8.68571e-05	-	-	-	-	-	8.05556e-05	-	6.13333e-06	0.000203846	0.0001266	0.000133333	0.000915663	-	7.96813e-06	0.000151282	7.66102e-06	-	-	-	-	-	7.54167e-06	-	-	-	-	-	-	-	-	-	-	-
KS	6.48491	175	-	-	0.168	0.113043	0.364545	0.324675	-	0.0692727	0.02	-	0.0504615	0.000645714	0.000262857	7e-05	0.00021871	0.00288626	0.00333704	-	0.00352778	0.00349091	5.86667e-06	0.000193846	-	-	-	-	1.91235e-05	-	1.9661e-05	-	-	-	8.34146e-05	-	-	-	-	-	-	4.57692e-05	-	-	3.65957e-05	8.26446e-06	-	-
MI	2.62339	-	-	-	0.112	-	0.0690909	-	-	0.0074	0.008	-	-	-	2.85714e-05	-	-	-	-	-	-	-	6.4e-06	-	-	-	-	-	-	-	2.24407e-05	-	-	-	-	-	-	-	-	1.16698e-05	-	-	-	-	-	-	-	-
MN	2.09399	-	-	-	-	-	0.0672727	-	-	0.00118182	0.024	-	-	-	0.000605714	-	0.00132258	-	0.000325926	-	0.000208333	-	-	-	-	-	-	-	2.31076e-06	-	-	-	-	-	-	-	-	-	-	-	-	-	-	3.73404e-05	-	-	-	-
NE	8.60432	1952.5	313.185	-	1.392	0.26087	1.02727	0.203377	-	0.128182	0.104	0.134118	0.00752308	0.0224	0.00618286	0.00352857	4.3871e-05	0.00563981	0.000407407	-	0.00161111	0.00324545	1.84e-05	0.0015	-	0.000153846	0.000421687	-	0.000160956	6.46154e-05	6.98305e-05	0.000109467	-	0.000106	2.90244e-05	-	2.55417e-05	-	5.00833e-05	-	-	8.92308e-06	-	-	2.21277e-05	-	-	-
NJ	11.0959	-	-	-	-	-	0.0881818	-	-	0.0725455	0.008	-	0.00293846	-	8.57143e-05	-	-	-	0.000285185	-	-	-	-	-	-	-	-	-	-	-	-	-	-	-	-	-	-	-	-	-	-	-	-	-	-	-	-	-
NY	4.15322	-	-	-	-	0.0289855	0.0263636	-	-	0.0138909	0.076	-	-	-	-	0.000497857	-	-	0.00518519	-	-	-	-	7e-05	-	-	-	-	-	-	-	-	-	-	-	-	-	-	-	-	-	-	-	-	-	-	-	-
OH	3.34643	-	-	-	0.208	0.0246377	0.133636	0.110909	-	0.0111091	-	-	0.0223077	-	0.000138286	2.71429e-05	-	0.000274882	0.00242963	-	0.000416667	0.000281818	-	0.000167692	-	0.000394872	-	-	1.11554e-05	-	7.18644e-06	-	-	-	1.12439e-05	-	-	-	-	-	-	3.45e-05	-	-	5.95745e-06	-	-	-
OK1	1.85167	125	16.2272	-	0.68	0.318841	0.0845455	0.0472727	-	0.0647273	0.016	0.0941176	0.0269231	-	0.00273143	0.000892857	4.70968e-05	0.00202844	-	-	0.000305556	-	7.46667e-06	0.000145385	0.0001324	-	-	0.000901961	-	-	2.26441e-05	-	-	-	-	-	-	-	-	-	4.59459e-05	-	-	-	-	2.33058e-05	-	1.01167e-05
OK2	3.42292	532.5	33.6714	9.27273	2.048	0.608696	1.26364	0.187013	-	0.05	0.028	-	0.0213846	-	0.000637714	0.00255714	5.41935e-06	0.00333175	0.00481481	-	0.000194444	0.00270909	0.00290667	3.61538e-05	0.00115	-	-	-	1.11554e-05	1.17949e-05	1.15932e-05	-	-	-	-	6.26667e-05	1.90417e-05	-	-	-	-	1.09615e-05	-	-	7.65957e-06	-	-	-
TX	2.12954	18.25	-	-	0.088	0.217391	0.0354545	-	-	0.00936364	0.02	-	-	-	6.4e-05	-	-	-	-	-	2.29167e-05	-	1.84e-05	-	-	-	-	-	-	-	1.31525e-05	-	-	-	-	-	-	-	-	-	-	-	-	-	-	-	-	-
VA	5.19348	12.25	-	-	0.144	-	0.241818	0.0553247	-	0.0832727	-	-	-	-	0.00413714	-	-	0.0020237	-	-	2.61111e-05	-	6.13333e-06	-	-	0.000728205	-	-	-	-	0.000105085	-	-	-	-	-	-	-	-	-	-	-	-	-	-	-	-	-
WA	5.21222	-	-	-	0.32	0.0521739	0.123636	0.0132468	-	0.0583636	0.012	-	-	-	0.00597714	-	-	-	-	-	-	-	-	-	-	0.00034359	-	-	-	9.84615e-05	1.35593e-05	-	-	-	-	-	3.25e-05	-	-	-	-	-	-	-	-	-	-	-
WI1	3.39718	237.5	-	-	-	0.188406	0.483636	0.85974	-	0.000441818	0.02	0.0443529	-	-	2.4e-05	-	-	-	0.000907407	0.00362055	4.75e-05	-	3.84e-05	0.00252308	-	-	0.000686747	-	-	3.07692e-05	-	-	-	-	-	-	5.125e-05	-	-	-	-	1.32308e-05	-	-	-	-	1.18214e-05	-
WI2	0.918485	87.5	-	-	0.192	0.0652174	0.279091	0.0272727	-	0.00274545	0.024	-	0.0207692	-	6.05714e-05	-	-	0.000947867	0.00196296	-	8.33333e-05	-	-	-	-	0.000241026	-	-	-	-	-	-	-	-	5.90244e-06	-	-	-	-	-	-	9.84615e-06	-	-	-	-	-	-
STQ	116.639	4225.75	506.288	9.27273	9.416	5.22464	5.75	3.17506	0.265333	0.92316	0.604	0.521412	0.179831	0.0230457	0.0557291	0.0219593	0.00925452	0.0392938	0.0244407	0.00362055	0.00716347	0.0123455	0.00308507	0.00708077	0.0030742	0.00441026	0.0020241	0.000901961	0.000300637	0.000394359	0.000499336	0.000109467	0.000108772	0.000106	0.000129585	0.0001888	0.000304333	5.67361e-05	9.1e-05	8.03752e-05	4.59459e-05	0.000234654	4.70588e-05	3.73404e-05	7.23404e-05	3.15702e-05	1.91429e-05	1.01167e-05
Max TQ	33.2578	1952.5	313.185	9.27273	2.048	1.42029	1.26364	0.85974	0.265333	0.174182	0.14	0.134118	0.0504615	0.0224	0.0204571	0.0102857	0.00748387	0.0057346	0.00518519	0.00362055	0.00352778	0.00349091	0.00290667	0.00252308	0.001588	0.00134359	0.000915663	0.000901961	0.000160956	0.000151282	0.000115254	0.000109467	0.000108772	0.000106	8.34146e-05	7.6e-05	7.58333e-05	5.67361e-05	5.00833e-05	4.87805e-05	4.59459e-05	4.57692e-05	4.18824e-05	3.73404e-05	3.65957e-05	2.33058e-05	1.18214e-05	1.01167e-05
#Table S2d. Site-specific Toxicity Quotients (TQ), based on U.S. Environmental Protection Agency (EPA) Office of Pesticide Programs (OPP) Acute Invertebrate Aquatic Life Benchmarks in Table S2c, for the Environmental Health Program, National Stormwater Reconnaissance. Red shading indicates relative TQ across all samples.
#["-" indicates chemical not detected or TQ (or STQ) < 0.00001]
[truncated: 1 more columns]

## Sheet: TABLE S2e. ACUTE NVP BENCHMK
CAS number	Chemical	Value
34256-82-1	Acetochlor	1.43
1912-24-9	Atrazine	1
131860-33-8	Azoxystrobin	49
1861-40-1	Benfluralin	100
82657-04-3	Bifenthrin	290
188425-85-6	Boscalid	1340
314-40-9	Bromacil	6.8
10605-21-7	Carbendazim	4580
63-25-2	Carbaryl	340
500008-45-7	Chlorantraniliprole	1780
1897-45-6	Chlorothalonil	12
2921-88-2	Chlorpyrifos	140
210880-92-5	Clothianidin	64000
7440-50-8	Copper	3.1
736994-63-1	Cyantraniliprole	10000
68359-37-5	Cyfluthrin	2
120983-64-4	Desthio-prothioconazole	4.8
1861-32-1	Dacthal (DCPA)	11000
165252-70-0	Dinotefuran	97600
97886-45-8	Dithiopyr	20
330-54-1	Diuron	3.08
5989-27-5	d-Limonene	9353
162650-77-3	Ethaboxam	3600
114369-43-6	Fenbuconazole	410
126833-17-8	Fenhexamid	4820
120068-37-3	Fipronil	140
239110-15-7	Fluopicolide	2600
51235-04-2	Hexazinone	7
91465-08-6	Lambda-cyhalothrin	310
161050-58-4	Methoxyfenoxide	3400
51218-45-2	Metolachlor	8
15299-99-7	Napropamide	2020
116714-46-6	Novaluron	32000
19044-88-3	Oryzalin	52
19666-30-9	Oxadiazon	5.2
42874-03-3	Oxyfluorfen	1.1
40487-42-1	Pendimethalin	5.2
219714-96-2	Penoxsulam	92
52645-53-1	Permethrin	4.4
51-03-6	Piperonyl butoxide	1210
1610-18-0	Prometon	98
60207-90-1	Propiconazole	21
53112-28-0	Pyrimethanil	1800
122-34-9	Simazine	6
107534-96-3	Tebuconazole	170
148-79-8	Thiabendazole	1420
153719-23-4	Thiamethoxam	99000
141517-21-7	Trifloxystrobin	37.1
1582-09-8	Trifluralin	21.9
#Table S2e. U.S. Environmental Protection Agency (EPA) Office of Pesticide Programs (OPP) Acute Non-Vascular Plant Aquatic Life Benchmarks in microgram/L (µg/L) used to calculate Toxicity Quotient results in Table S2f.

[truncated: 3 more sheets: TABLE S2f. TQ ACUTE NV PLANT, TABLE S2g. ACUTE VP BENCHMK, TABLE S2h. TQ ACUTE V PLANT]
